# Supplementary material
Source: PubMed Central journal article supplement (PMC2943377)
Supplement: NIHMS225135-supplement-1_si_001.pdf [file NIHMS225135-supplement-1_si_001.pdf]

# Constraining binding hot spots: NMR and MD simulations provide a structural explanation for enthalpy-entropy compensation in SH2-ligand binding

*Joshua M. Ward*<sup>†</sup>, *Nina M. Gorenstein*<sup>†</sup>, *Jianhua Tian*<sup>§</sup>, *Stephen F. Martin*<sup>§</sup>, and *Carol Beth Post*<sup>\*†</sup>

Department of Chemistry and Biochemistry and The Institute of Cellular and Molecular Biology, The University of Texas, Austin, TX 78712, and Department of Medicinal Chemistry and Pharmacology, Markey Center for Structural Biology, and Purdue Cancer Center, Purdue University, West Lafayette, IN

47907

## SUPPLEMENTARY INFORMATION

Full reference #45

Brooks, B. R.; Brooks, C. L.; Mackerell, A. D.; Nilsson, L.; Petrella, R. J.; Roux, B.; Won, Y.; Archontis, G.; Bartels, C.; Boresch, S.; Caflisch, A.; Caves, L.; Cui, Q.; Dinner, A. R.; Feig, M.; Fischer, S.; Gao, J.; Hodoscek, M.; Im, W.; Kuczera, K.; Lazaridis, T.; Ma, J.; Ovchinnikov, V.; Paci, E.; Pastor, R. W.; Post, C. B.; Pu, J. Z.; Schaefer, M.; Tidor, B.; Venable, R. M.; Woodcock, H. L.; Wu, X.; Yang, W.; York, D. M.; Karplus, M. *J. Comput. Chem.* **2009**, *30*, 1545-1614.

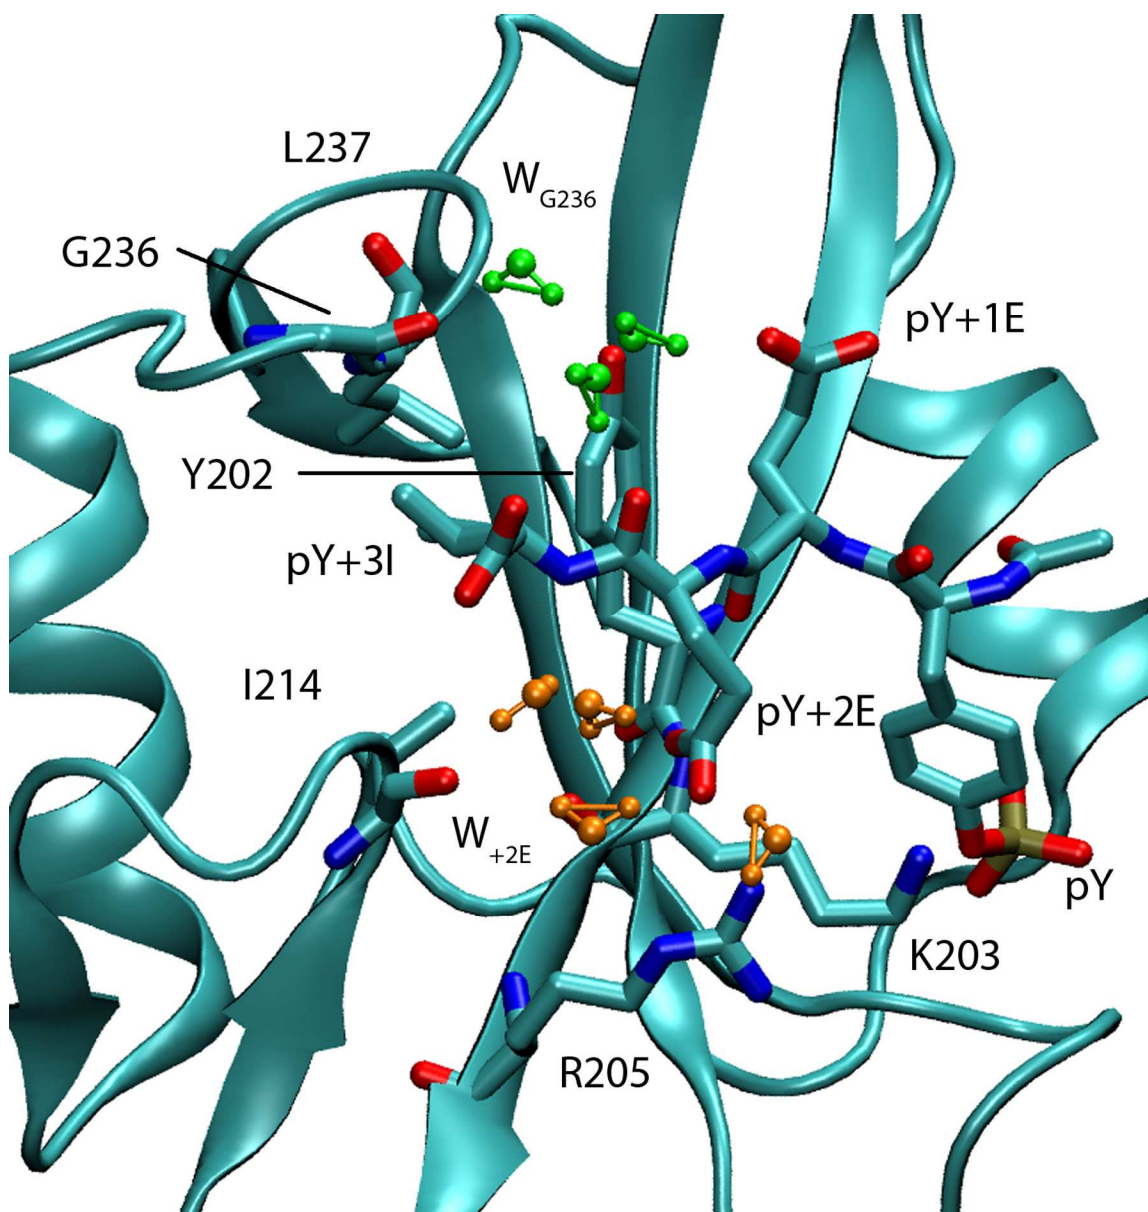

Figure S1. Structural view of the hydrophobic binding pocket illustrating the examined interfacial water molecules as explained in Materials and Methods.  $W_{G236}$  (green) denotes water molecules in each molecular dynamics snapshot with oxygen atoms located within 6.0 Å of non-hydrogen atoms of Y202 and G236 or L237.  $W_{+2E}$  (orange) denotes water molecules in each snapshot with oxygen atoms located within 3.2 Å of non-hydrogen atoms of both pY+2E and R205, as well as within 6.0 Å of both the K203 and I214 main-chain heavy atoms.

**Table S1.** Chemical shift differences for main-chain  $^{15}\text{N}$ -HSQC peaks and reported mutant binding thermodynamics for important residues

| Residue                    | fpY-pY<br>CSD <sup>a</sup> | cpY-pY<br>CSD <sup>a</sup> | cpY-fpY<br>CSD <sup>a</sup> | Atoms                      | Mutation             | $\Delta\Delta\text{G}^b$ | $\Delta\Delta\text{H}^b$ | $\text{T}\Delta\Delta\text{S}^b$ |
|----------------------------|----------------------------|----------------------------|-----------------------------|----------------------------|----------------------|--------------------------|--------------------------|----------------------------------|
| pY                         |                            |                            |                             |                            | pY to Y <sup>c</sup> | ~ 6                      | ~ 4                      | ~ -2                             |
| I153                       | 0.034                      | 0.053                      | 0.087                       | N-H                        |                      |                          |                          |                                  |
| T154 ( $\alpha\text{A1}$ ) | 0.054                      | 0.027                      | 0.080                       | N-H                        |                      |                          |                          |                                  |
| R155 ( $\alpha\text{A2}$ ) | 0.033                      | 0.028                      | 0.048                       | N-H                        | R to A <sup>c</sup>  | 1.1                      | 3.0                      | 1.9                              |
|                            | 0.007                      | 0.010                      | 0.015                       | N $\epsilon$ -H $\epsilon$ |                      |                          |                          |                                  |
| R175 ( $\beta\text{B5}$ )  | 0.023                      | 0.034                      | 0.057                       | N-H                        | R to A <sup>c</sup>  | 3.2                      | 4.1                      | 0.9                              |
|                            | 0.059                      | 0.057                      | 0.106                       | N $\epsilon$ -H $\epsilon$ |                      |                          |                          |                                  |
|                            | 0.255                      | 0.332                      | 0.586                       | N $\eta$ -H $\eta$         |                      |                          |                          |                                  |
| E176 ( $\beta\text{B6}$ )  | 0.041                      | 0.083                      | 0.118                       | N-H                        |                      |                          |                          |                                  |
| S177 ( $\beta\text{B7}$ )  | 0.060                      | 0.135                      | 0.188                       | N-H                        | S to A <sup>c</sup>  | 0.9                      | -1.6                     | -2.5                             |
| E178 ( $\text{BC1}$ )      | 0.278                      | 0.281                      | 0.558                       | N-H                        | E to A <sup>c</sup>  | 0.4                      | 0.6                      | 0.2                              |
| T179 ( $\text{BC2}$ )      | 0.144                      | 0.046                      | 0.184                       | N-H                        | T to A <sup>c</sup>  | 0.9                      | -0.2                     | -1.1                             |
| T180 ( $\text{BC3}$ )      | 0.054                      | 0.114                      | 0.068                       | N-H                        | T to A <sup>c</sup>  | -0.2                     | -1.4                     | -1.2                             |
| C185 ( $\beta\text{C3}$ )  | 0.047                      | 0.112                      | 0.155                       | N-H                        | C to A <sup>c</sup>  | -1.1                     | 0.1                      | 1.2                              |
|                            |                            |                            |                             |                            | C to S <sup>c</sup>  | -0.8                     | 0.0                      | 0.8                              |
| L186 ( $\beta\text{C4}$ )  | 0.095                      | 0.231                      | 0.326                       | N-H                        |                      |                          |                          |                                  |
| S187 ( $\beta\text{C5}$ )  | 0.008                      | 0.065                      | 0.072                       | N-H                        | S to A <sup>c</sup>  | 0.2                      | 1.0                      | 0.8                              |
| K200 ( $\beta\text{D3}$ )  | 0.022                      | 0.032                      | 0.051                       | N-H                        | K to A <sup>d</sup>  | 1.2                      | 2.0                      | 0.8                              |
| H201 ( $\beta\text{D4}$ )  | 0.072                      | 0.049                      | 0.116                       | N-H                        | H to A <sup>c</sup>  | 0.3                      | -0.7                     | -1.0                             |
| Y202 ( $\beta\text{D5}$ )  | 0.065                      | 0.129                      | 0.096                       | N-H                        | Y to I <sup>d</sup>  | 2.1                      | 5.1                      | 3.0                              |
| K203 ( $\beta\text{D6}$ )  | 0.018                      | 0.068                      | 0.069                       | N-H                        | K to A <sup>c</sup>  | 1.4                      | 1.5                      | 0.1                              |
| I204 ( $\beta\text{D7}$ )  | 0.042                      | 0.114                      | 0.156                       | N-H                        |                      |                          |                          |                                  |
| R205 ( $\beta\text{D}'1$ ) | 0.021                      | 0.019                      | 0.032                       | N-H                        | R to A <sup>d</sup>  | 0.6                      | 0.1                      | -0.5                             |
|                            | 0.012                      | 0.036                      | 0.024                       | N $\epsilon$ -H $\epsilon$ | R to F <sup>d</sup>  | 0.3                      | -0.3                     | -0.6                             |
| I214 ( $\beta\text{E4}$ )  | 0.007                      | 0.025                      | 0.021                       | N-H                        | I to A <sup>d</sup>  | 0.3                      | -1.4                     | -1.7                             |
| T215 ( $\text{EF1}$ )      | 0.021                      | 0.055                      | 0.073                       | N-H                        | T to A <sup>d</sup>  | 0.1                      | 1.2                      | 1.1                              |
| S216 ( $\text{EF2}$ )      | 0.053                      | 0.174                      | 0.227                       | N-H                        |                      |                          |                          |                                  |
| R217 ( $\text{EF3}$ )      | 0.009                      | 0.016                      | 0.018                       | N-H                        | R to A <sup>d</sup>  | 0.2                      | 0.7                      | 0.5                              |
| T218                       | 0.030                      | 0.108                      | 0.137                       | N-H                        |                      |                          |                          |                                  |
| D235 ( $\text{BG2}$ )      | 0.017                      | 0.041                      | 0.058                       | N-H                        | D to A <sup>d</sup>  | -0.2                     | -0.1                     | 0.1                              |
| G236 ( $\text{BG3}$ )      | 0.027                      | 0.101                      | 0.128                       | N-H                        |                      |                          |                          |                                  |
| L237 ( $\text{BG4}$ )      | 0.030                      | 0.100                      | 0.129                       | N-H                        | L to A <sup>d</sup>  | 0.6                      | -1.2                     | -1.8                             |
| C238 ( $\text{BG5}$ )      | 0.019                      | 0.048                      | 0.067                       | N-H                        |                      |                          |                          |                                  |

a) ppm

b) relative to wild type, in kcal/mol

c) Bradshaw, J. M.; Mitaxov, V.; Waksman, G. *J. Mol. Biol.* **1999**, *293*, 971-985.

d) Bradshaw, J. M.; Mitaxov, V.; Waksman, G. *J. Mol. Biol.* **2000**, *29*, 521-535.

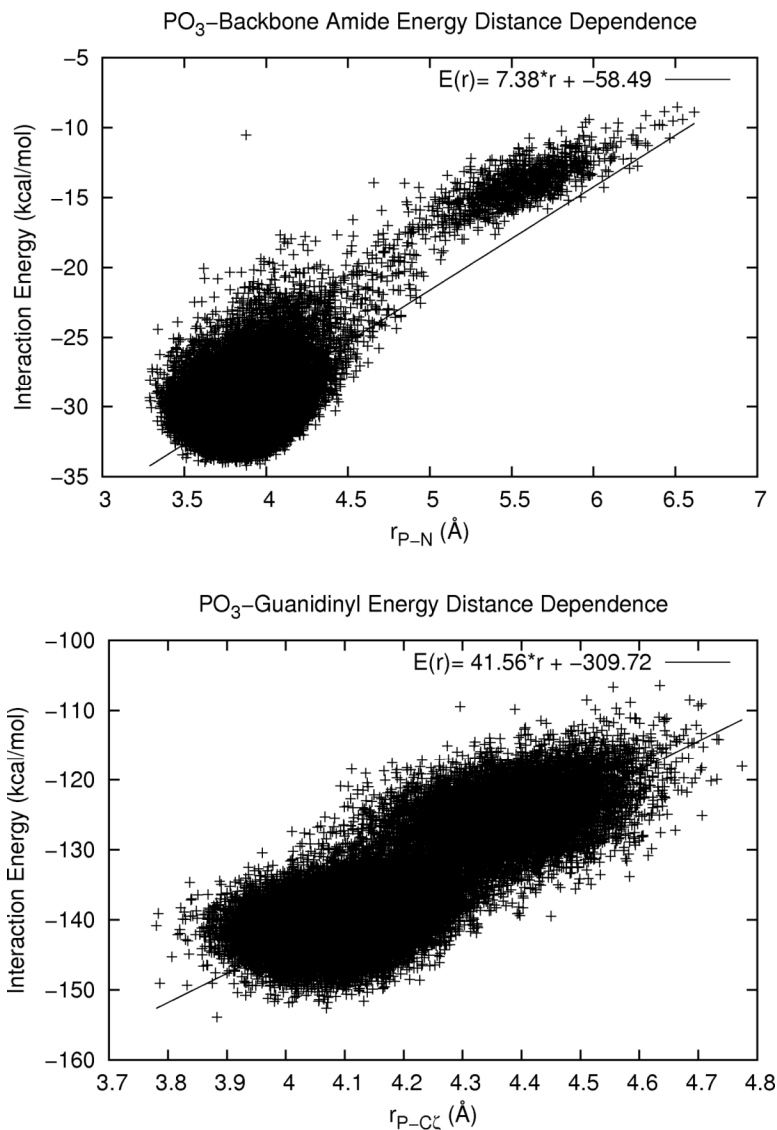

Figure S2. The distance dependence of phosphoryl interaction energies were calculated from MD simulations of the SH2-pYEEI, SH2-cpYEEI, and SH2-fpYEEI complexes. The distance between the phosphorous atom and the main-chain nitrogen atom of E178 or the guanidinyl C $\zeta$  carbon atom of R175, respectively, was calculated for each of 45,000 coordinate snapshots. The non-bond energy between two electrostatically neutral groups was calculated for each snapshot using the CHARMM27 force field. The groups, defined in the CHARMM27 force-field topology include the phosphorous atom, the four oxygen atoms, and the C $\zeta$  carbon atom of the pY ring for the “PO<sub>3</sub>” group, the main-chain nitrogen atom and hydrogen atom, alpha carbon atom and alpha hydrogen atom for the “backbone amide” group of E178 (top), and the C $\zeta$ , three nitrogen atoms and associated hydrogen atoms of the R175 guanidinyl group (bottom).

\* supplementary topology for N,N-dimethyl cyclopropanecarboxamide model

\* J Ward 10 May 2004

\*

\* Prior to streaming, you must first read:

\* top\_all27\_prot\_na.rtf, par\_all27\_prot\_na.prm

\* and stream supplementary patch file:

\* toppar\_prot\_na\_all.str

read rtf card append

\* Topology for trisubstituted cycloproyl derivative peptidomimetics

\*

27 1

!MASS 100 C3 12.01100 C ! cyclopropane carbon

DECL -CA

DECL -C

DECL -O

DECL +N

DECL +HN

DECL +CA

RESI C3 0.00 ! Cyclopropane

GROUP !

ATOM C1 C3 -0.18 !

ATOM C2 C3 -0.18 !

ATOM C3 C3 -0.18 !

ATOM H4 HB 0.09 !

ATOM H5 HB 0.09 !

ATOM H6 HB 0.09 !

ATOM H7 HB 0.09 !

ATOM H8 HB 0.09 !

ATOM H9 HB 0.09 !

BOND C1 C2 C2 C3 C3 C1 C1 H4 C1 H7 C2 H5 C2 H8 C3 H6 C3 H9

PATCHING FIRST NONE LAST NONE

RESI NMCA 0.00 ! N-methyl cyclopropanecarboxamide

GROUP !

ATOM C1 C3 -0.18 !

ATOM C2 C3 -0.18 !

ATOM C3 C3 -0.09 !

ATOM C4 C 0.51 !

ATOM O5 O -0.51 !

ATOM N6 NH1 -0.47 !

ATOM C7 CT3 -0.11 !

ATOM H8 HB 0.09 !

ATOM H9 HB 0.09 !

ATOM H10 HB 0.09 !

ATOM H11 HB 0.09 !

ATOM H12 HB 0.09 !

ATOM H13 H 0.31 !

ATOM H14 HA 0.09 !

ATOM H15 HA 0.09 !

ATOM H16 HA 0.09 !

BOND C1 C2 C2 C3 C1 C3 C3 C4 C4 N6 N6 C7 C7 H14 C7 H15 C7 H16

BOND C1 H8 C2 H9 C3 H10 C1 H11 C2 H12 N6 H13

DOUBLE C4 O5

IMPR C4 C3 N6 O5 N6 C4 C7 H13

PATCHING FIRST NONE LAST NONE

RESI DMCA 0.00 ! N,N-dimethyl cyclopropanecarboxamide

GROUP !

ATOM C1 C3 -0.18 !

ATOM C2 C3 -0.18 !

ATOM C3 C3 -0.09 !

ATOM C4 C 0.51 !

ATOM O5 O -0.51 !

ATOM N6 NH1 -0.32 !

ATOM C7 CT3 -0.11 !

ATOM C8 CT3 -0.11 !

BOND C1 C2 C2 C3 C1 C3 C3 C4 C4 N6 N6 C7 C7 H14 C7 H15 C7 H16

BOND C1 H8 C2 H9 C3 H10 C1 H11 C2 H12 N6 H13

BOND C4 O5

BOND C4 C3 N6 O5 N6 C4 C7 H13

PATCHING FIRST NONE LAST NONE

```

ATOM H9  HB  0.09  !      H13  H11      C8--H17
ATOM H10 HB  0.09  !      /      \
ATOM H11 HB  0.09  !      H19     H18
ATOM H12 HB  0.09  !
ATOM H13 HB  0.09  !
ATOM H14 HA  0.09  !
ATOM H15 HA  0.09  !
ATOM H16 HA  0.09  !
ATOM H17 HA  0.09  !
ATOM H18 HA  0.09  !
ATOM H19 HA  0.09  !
BOND C1 C2  C1 C3  C2 C3  C3 C4  C4 N6  N6 C7  N6 C8
BOND C1 H9  C2 H10 C3 H11 C1 H12 C2 H13
BOND C7 H14 C7 H15 C7 H16 C8 H17 C8 H18 C8 H19
DOUBLE C4 O5
IMPR C4 C3 N6 O5  N6 C4 C7 C8
PATCHING FIRST NONE LAST NONE

```

```

RESI PCP      0.00  !  para-cyclopropyl phenol
GROUP        !  Model compound
ATOM C1  C3   -0.18 !      J Ward  24 Mar 2004
ATOM C2  C3   -0.18 !
ATOM C3  C3   -0.09 !
ATOM C4  CA    0.000 !      H11 H14  H16  H17
ATOM C5  CA   -0.115 !      \  /      |      |
ATOM C6  CA   -0.115 !      C1      C5--C6
ATOM C7  CA    0.110 !      /  \      //      \
ATOM C8  CA   -0.115 ! H12--C2--C3--C4      C7--O10
ATOM C9  CA   -0.115 !      /      |      \      /      \
ATOM O10 OH1  -0.54  !      H15     H13     C9==C8      H20
ATOM H11 HB    0.09  !      |      |
ATOM H12 HB    0.09  !      H19   H18
ATOM H13 HB    0.09  !
ATOM H14 HB    0.09  !
ATOM H15 HB    0.09  !
ATOM H16 HP    0.115 !
ATOM H17 HP    0.115 !
ATOM H18 HP    0.115 !
ATOM H19 HP    0.115 !
ATOM H20 H     0.43  !
BOND C1 C2  C2 C3  C1 C3  C3 C4  C5 C6  C7 C8  C4 C9  C7 O10
BOND C1 H11 C1 H14 C2 H12 C2 H15 C3 H13 C5 H16 C6 H17
BOND C8 H18 C9 H19 O10 H20
DOUBLE C4 C5  C6 C7  C8 C9
PATCHING FIRST NONE LAST NONE

```

```

RESI PTC          0.00 ! Constrained phosphotyrosine residue (cpY)
GROUP            ! Copied from PRES CT3 in top_all27_prot_na.rtf
ATOM C1  C        0.51 ! N-Methylamide C-terminus
ATOM O1  O       -0.51 ! Appropriate name changes made, atom types
GROUP            ! and charges left alone
ATOM C2  CT3     -0.11 !
ATOM H21 HA        0.09 !
ATOM H22 HA        0.09 !
ATOM H23 HA        0.09 ! The rest is based on RESI TYR, (N->C7)
ATOM N1  NH1     -0.47 !
ATOM H1  H         0.31 !
GROUP
ATOM C7  C3     -0.09 !
ATOM H7  HB        0.09 !
GROUP
ATOM CA  C3     -0.09 !
ATOM HA  HB        0.09 !
GROUP
ATOM CB  C3     -0.09 !
ATOM HB  HB        0.09 !
GROUP
ATOM CG  CA        0.00 !
GROUP
ATOM CD1 CA     -0.115 !
ATOM HD1 HP        0.115 !
GROUP
ATOM CE1 CA     -0.115 !
ATOM HE1 HP        0.115 !
GROUP
ATOM CZ  CA        0.11 !
ATOM OH  OH1     -0.54 !
ATOM HH  H         0.43 ! Will need to apply TP2 patch to model the
GROUP            ! phosphorylated drug
ATOM CD2 CA     -0.115 !
ATOM HD2 HP        0.115 !
GROUP
ATOM CE2 CA     -0.115 !
ATOM HE2 HP        0.115 !
GROUP
ATOM C   C         0.51 !
ATOM O   O       -0.51 !
BOND CB  CA  CG  CB  CD2 CG  CE1 CD1  C2 H21  C2 H22  C2 H23
BOND CZ  CE2 OH  CZ  C7 CA  C7 C1  C7 CB
BOND N1  H1  N1  C1  C  CA  C  +N  N1  C2
BOND CA  HA  CB  HB  C7 H7  CD1 HD1  CD2 HD2
BOND CE1 HE1 CE2 HE2 OH  HH
DOUBLE C  O  C1 O1  CG CD1  CD2 CE2  CE1 CZ
IMPR C1  C7 N1 O1  C CA +N O
IC +N  O  *C  CA  1.3510  31.0000  180.0000  122.0000  1.4950
IC CB  C  *CA HA  1.4950  31.0000  150.0000  118.0000  1.0760
IC C7  CB  *CA HA  1.5080  60.0000  105.0000  116.5000  1.0760
IC C   CA  C7  C1  1.4950  117.0000  -140.0000  118.0000  1.4970
IC C7  CA  *CB HB  1.5080  60.0000  103.0000  113.5010  1.0760
IC C7  HB  *CB CG  1.0760  40.0000  148.0000  115.0000  1.5000
IC C1  CB  *C7 H7  1.4950  29.0000  -148.0000  115.0000  1.0760
IC O1  C1  C7  H7  1.2020  123.0000  -161.0000  116.0000  1.0760
IC N1  C7  *C1 O1  1.3520  31.0000  -179.0000  123.0000  1.2020
IC O1  C1  N1  H1  1.2020  122.0000  180.0000  122.0000  0.9930
IC C1  H1  *N1 C2  1.3520  33.5000  180.0000  118.5000  1.3530
IC C1  N1  C2  H21  1.3520  119.0000  180.0000  109.6000  1.0760
IC H21 N1  *C2 H22  1.0760  109.6000  120.0000  119.0000  1.0760
IC H21 N1  *C2 H23  1.0760  109.6000  -120.0000  119.0000  1.0760
IC CA  CB  CG  CD1  1.5606  112.9400  90.0000  120.4900  1.4064
IC CD1 CB  *CG CD2  1.4064  120.4900  -176.4600  120.4600  1.4068
IC CB  CG  CD1 CE1  1.5113  120.4900  -175.4900  120.4000  1.4026
IC CE1 CG  *CD1 HD1  1.4026  120.4000  178.9400  119.8000  1.0814
IC CB  CG  CD2 CE2  1.5113  120.4600  175.3200  120.5600  1.4022
IC CE2 CG  *CD2 HD2  1.4022  120.5600  -177.5700  119.9800  1.0813
IC CG  CD1 CE1 CZ  1.4064  120.4000  -0.1900  120.0900  1.3978
IC CZ  CD1 *CE1 HE1  1.3978  120.0900  179.6400  120.5800  1.0799

```

```

IC CZ   CD2  *CE2 HE2   1.3979 119.9200 -178.6900 119.7600 1.0798
IC CE1  CE2  *CZ  OH    1.3978 120.0500 -178.9800 120.2500 1.4063
IC CE1  CZ   OH   HH    1.3978 119.6800  175.4500 107.4700 0.9594
PATCHING FIRST NONE LAST NONE

```

```

PRES SM1          0.00 ! Patch residue to convert TYR to fpY
DELETE ATOM N      ! use in generate statement
DELETE ATOM HN     ! * Edited version of PRES CT3
!DELETE ATOM CA    ! top_all27_protein_lipid.inp
!DELETE ATOM HA    !
GROUP              ! Apply TP2 patch after generation to add phosphate
ATOM CA   CT1     -0.09 !
ATOM HA   HB       0.09 !
GROUP              !
ATOM C7   CT2     -0.18 !
ATOM H71  HA       0.09 !
ATOM H72  HA       0.09 !
GROUP              !
ATOM C1    C       0.51 !   |
ATOM O1    O      -0.51 !   |
GROUP              !   |
ATOM N1   NH1     -0.47 !   |
ATOM H1    H       0.31 !   |
ATOM C2   CT3     -0.11 !   |
ATOM H21  HA       0.09 !   |
ATOM H22  HA       0.09 !   |
ATOM H23  HA       0.09 !   |

```

```

BOND C7 CA   C7 H71   C7 H72   C7 C1   C1 N1   N1 C2   C2 H21   C2 H22
BOND N1 H1   C2 H23
DOUBLE C1 O1
!DIHE C7 C1 N1 C2
IMPR N1 C1 C2 H1   C1 C7 N1 O1
DONOR H1 N1

```

```

IC C7   C   *CA  HA    1.4501 106.5200 -116.0400 107.1500 1.0833
IC C1   CA  *C7  H71   1.5000 112.9400  120.0000 109.6000 1.0760
IC C1   H71 *C7  H72   1.5000 112.9400 -120.0000 109.6000 1.0760
IC CA   C7  C1   O1    1.5000 118.0000 -160.0000 123.0000 1.5000
IC N1   C7  *C1  O1    1.3520  31.0000 -179.0000 123.0000 1.2020
IC O1   C1  N1   H1    1.2020 122.0000  180.0000 122.0000 1.3530
IC C1   H1  *N1  C2    1.3520  33.5000  180.0000 118.5000 1.3530
IC C1   N1  C2   H21   1.3520 119.0000  180.0000 109.6000 1.0760
IC H21  N1  *C2  H22   1.0760 109.6000  120.0000 119.0000 1.0760
IC H21  N1  *C2  H23   1.0760 109.6000 -120.0000 119.0000 1.0760

```

```

PRES SM2          0.00 ! Methyl group for inhibitors 5 and 7
DELETE ATOM H1    ! from Davidson et al, JACS (2002) 124(2):205
                  ! Modified from PRES ACE
GROUP              !   top_all27_prot_na.rtf

```

```

ATOM N1   NH1     -0.32 !
ATOM C2   CT3     -0.11 !
ATOM H21  HA       0.09 !
ATOM H22  HA       0.09 !
ATOM H23  HA       0.09 !
ATOM C3   CT3     -0.11 !
ATOM H31  HA       0.09 !   H33
ATOM H32  HA       0.09 !   |
ATOM H33  HA       0.09 !   |

```

```

BOND C3 N1   C3 H31   C3 H32   C3 H33
ANGL N1 C3 H31  N1 C3 H32  N1 C3 H33  H31 C3 H32  H31 C3 H33  H32 C3 H33
DIHE C1 N1 C3 H31  C1 N1 C3 H32  C1 N1 C3 H33  O1 C1 N1 C3  C3 N1 C1 C7
IMPR N1 C1 C2 C3
IC C1   C2  *N1  C3    1.3520  33.5000  180.0000 118.5000 1.3530
IC C1   N1  C3   H31   1.3520 122.3700  19.1200 109.6000 1.0760
IC C1   N1  C3   H32   1.3520 122.3700 137.7520 109.6000 1.0760
IC C1   N1  C3   H33   1.3520 122.3700 -102.3930 109.6000 1.0760

```

END



read para card append  
 \* additional parameters for trisubstituted cyclopropyl derivative  
 \* peptidomimetics  
 \*

BONDS

|    |    |         |        |   |                           |  |  |
|----|----|---------|--------|---|---------------------------|--|--|
| C3 | C3 | 210.000 | 1.5010 | ! | cyclopropane optimization |  |  |
|    |    | !       |        |   | JMW 18 Jun 04             |  |  |
| C3 | HB | 360.000 | 1.0830 | ! | cyclopropane optimization |  |  |
|    |    | !       |        |   | JMW 18 Jun 04             |  |  |
| C3 | C  | 200.000 | 1.4900 | ! | JMW 21 Jun 04             |  |  |
|    |    | !       |        |   |                           |  |  |
| C3 | CA | 200.000 | 1.4900 | ! | JMW 21 Jun 04             |  |  |
|    |    | !       |        |   |                           |  |  |

ANGLES

|     |     |     |        |        |      |         |                                         |
|-----|-----|-----|--------|--------|------|---------|-----------------------------------------|
| C3  | C3  | C3  | 30.000 | 60.00  | 0.00 | 1.50000 | !                                       |
|     |     |     | !      |        |      |         | cyclopropane optimization JMW 18 Jun 04 |
| C3  | C3  | HB  | 26.000 | 118.13 | 4.00 | 2.22000 | !                                       |
|     |     |     | !      |        |      |         | cyclopropane optimization JMW 18 Jun 04 |
| HB  | C3  | HB  | 24.200 | 114.04 | 0.50 | 2.51000 | !                                       |
|     |     |     | !      |        |      |         | cyclopropane optimization JMW 18 Jun 04 |
| C3  | C3  | C   | 62.000 | 117.86 | 0.00 | 2.56000 | !                                       |
|     |     |     | !      |        |      |         | JMW 21 Jun 04                           |
| HB  | C3  | C   | 43.000 | 115.00 | 0.00 | 2.20000 | !                                       |
|     |     |     | !      |        |      |         | JMW 21 Jun 04                           |
| C3  | C   | O   | 40.000 | 121.25 | 0.00 | 2.36000 | !                                       |
|     |     |     | !      |        |      |         | JMW 21 Jun 04                           |
| C3  | C   | NH1 | 50.000 | 119.40 | 0.00 | 2.44000 | !                                       |
|     |     |     | !      |        |      |         | JMW 21 Jun 04                           |
| CT3 | NH1 | CT3 | 35.000 | 116.91 | 0.00 | 2.47000 | !                                       |
|     |     |     | !      |        |      |         | JMW 21 Jun 04                           |
| C3  | CA  | CA  | 30.000 | 121.36 | !    |         |                                         |
|     |     |     | !      |        |      |         | JMW 21 Jun 04                           |
| HB  | C3  | CA  | 30.000 | 112.94 | !    |         |                                         |
|     |     |     | !      |        |      |         | JMW 21 Jun 04                           |
| C3  | C3  | CA  | 40.000 | 122.31 | !    |         |                                         |
|     |     |     | !      |        |      |         | JMW 21 Jun 04                           |
| CT2 | CT1 | CT2 | 53.350 | 111.00 | 8.00 | 2.56100 | !                                       |
|     |     |     | !      |        |      |         | Assigned by analogy JMW 22 Jun 04       |
| CT1 | CT2 | C   | 52.000 | 108.00 | !    |         |                                         |
|     |     |     | !      |        |      |         | Assigned by analogy JMW 22 Jun 04       |

DIHEDRALS

|     |     |     |     |        |   |        |                                            |
|-----|-----|-----|-----|--------|---|--------|--------------------------------------------|
| X   | C3  | C3  | X   | 1.0000 | 3 | 180.00 | !                                          |
|     |     |     | !   |        |   |        | cyclopropane optimization JMW 18 Jun 04    |
| C3  | C3  | C   | O   | 1.8000 | 1 | 180.00 | !                                          |
|     |     |     | !   |        |   |        | JMW 21 Jun 04                              |
| HB  | C3  | C   | O   | 0.9000 | 2 | 180.00 | !                                          |
|     |     |     | !   |        |   |        | JMW 21 Jun 04                              |
| C3  | C3  | C   | NH1 | 0.0000 | 3 | 0.00   | !                                          |
|     |     |     | !   |        |   |        | JMW 21 Jun 04                              |
| HB  | C3  | C   | NH1 | 0.0000 | 1 | 0.00   | !                                          |
|     |     |     | !   |        |   |        | JMW 21 Jun 04                              |
| C3  | C   | NH1 | CT3 | 2.5000 | 4 | 180.00 | !                                          |
|     |     |     | !   |        |   |        | JMW 21 Jun 04                              |
| C3  | C   | NH1 | CT1 | 2.5000 | 4 | 180.00 | !                                          |
|     |     |     | !   |        |   |        | Assigned by analogy to above JMW 22 Jun 04 |
| C3  | C   | NH1 | H   | 2.5000 | 2 | 180.00 | !                                          |
|     |     |     | !   |        |   |        | JMW 21 Jun 04                              |
| CT3 | NH1 | CT3 | HA  | 0.0000 | 1 | 0.00   | !                                          |
|     |     |     | !   |        |   |        | JMW 21 Jun 04                              |
| C3  | C3  | CA  | CA  | 0.7300 | 2 | 180.00 | !                                          |
|     |     |     | !   |        |   |        | JMW 21 Jun 04                              |
| HB  | C3  | CA  | CA  | 0.1000 | 3 | 0.00   | !                                          |
|     |     |     | !   |        |   |        | JMW 21 Jun 04                              |
| C3  | CA  | CA  | CA  | 0.0000 | 1 | 0.00   | !                                          |
|     |     |     | !   |        |   |        | JMW 21 Jun 04                              |
| HP  | CA  | CA  | C3  | 0.0000 | 1 | 0.00   | !                                          |
|     |     |     | !   |        |   |        | JMW 21 Jun 04                              |
| CT1 | CT2 | C   | O   | 1.4000 | 1 | 0.00   | !                                          |

```

!          Assigned by analogy JMW 22 Jun 04
CT1 CT2 C  NH1  0.0000 1  0.00 !
!          Assigned by analogy JMW 22 Jun 04

IMPRopers
! PTC parameters by JMW
NH1 C  CT3 CT3  0.5000      0  180.0000 ! SMI 5 & 7
!          optimized      JMW 21 Jun 04
NH1 X  X  CT3  1.0000      0  0.0000 ! SMI 5 & 7
!          optimized      JMW 21 Jun 04

NONBONDED nbxmod 5 atom cdiel shift vatom vdistance vswitch -
cutnb 14.0 ctofnb 12.0 ctonnb 10.0 eps 1.0 e14fac 1.0 wmin 1.5
!adm jr., 5/08/91, suggested cutoff scheme
C3 0.000000 -0.020000 2.275000 ! cyclopropane JMW 16 april 04
end

```
